# Supplementary material for: Clinical Features And Incidence Of Visual Improvement Following Systemic Antibiotic Treatment In Patients With Syphilitic Uveitis
Source: Research Square preprint supplement (doi:10.21203/rs.3.rs-1406326/v1), 2022-03-08
Supplement: Supplementary file 1 [file 543cd20844478001199a1595.docx]

**
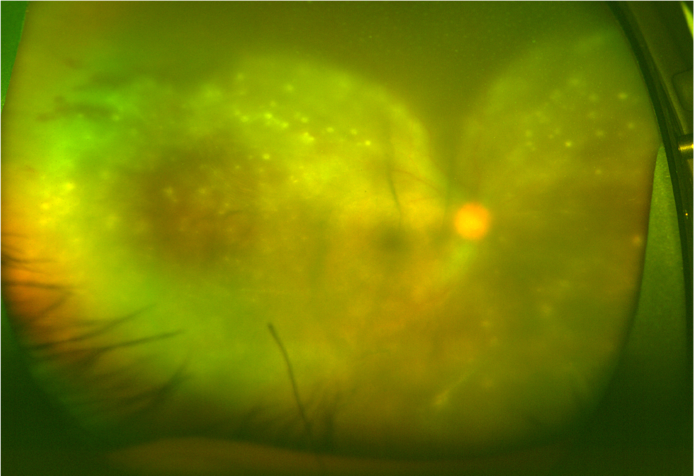
**

**Figure S1.** Wide-field fundus photograph demonstrating the feature of opacified retinitis with multiple superficial retinal precipitates

**
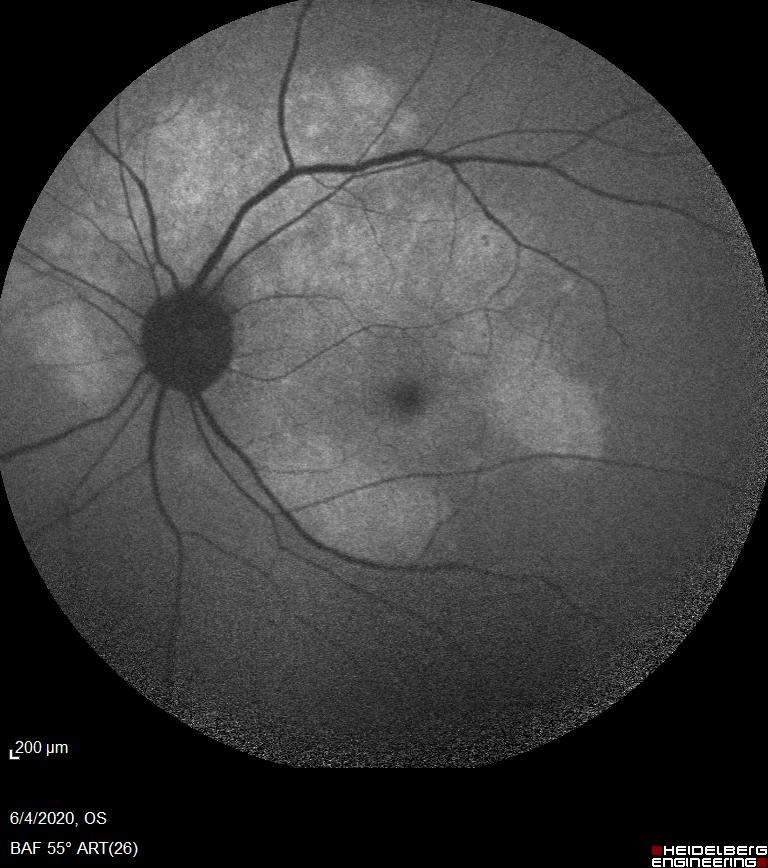
**

**Figure S2.** Fundus autofluorescence photo demonstrating the placoid appearing area of abnormality
